# Supplementary material for: One-pot synthesis of PLA-b-PHEA via sequential ROP and RAFT polymerizations
Source: Royal Society of Chemistry journal article supplement (doi:10.1039/c7py01176h), 2017-01-01
Supplement: c7py01176h1.pdf [file c7py01176h1.pdf]

## Supporting Information

# One-pot synthesis of PLA-*b*-PHEA *via* sequential ROP and RAFT polymerizations

*Ilknur Yildirim,<sup>a,b</sup> Pelin Sungur,<sup>a,b</sup> Anna C. Crecelius-Vitz,<sup>a,b</sup> Turgay Yildirim,<sup>a,b</sup> Diana Kalden,<sup>c</sup> Stephanie Hoeppener,<sup>a,b</sup> Matthias Westerhausen,<sup>c</sup> Christine Weber,<sup>a,b</sup> Ulrich S. Schubert<sup>a,b\*</sup>*

<sup>a</sup> Laboratory of Organic and Macromolecular Chemistry (IOMC), Friedrich Schiller University Jena, Humboldtstr. 10, 07743 Jena, Germany

<sup>b</sup> Jena Center for Soft Matter (JCSM), Friedrich Schiller University Jena, Philosophenweg 7, 07743 Jena, Germany

<sup>c</sup> Institute of Inorganic and Analytical Chemistry (IAAC), Friedrich Schiller University Jena, Humboldtstr. 8, 07743 Jena, Germany

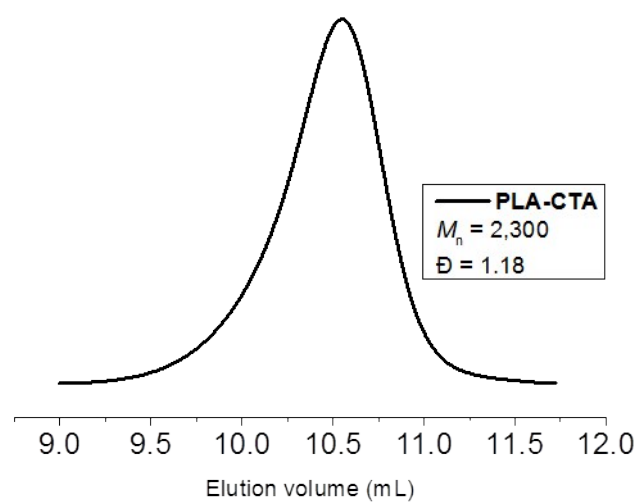

**Figure S1.** SEC trace of the isolated **PLA-CTA** (THF, RI detection, PLA calibration).

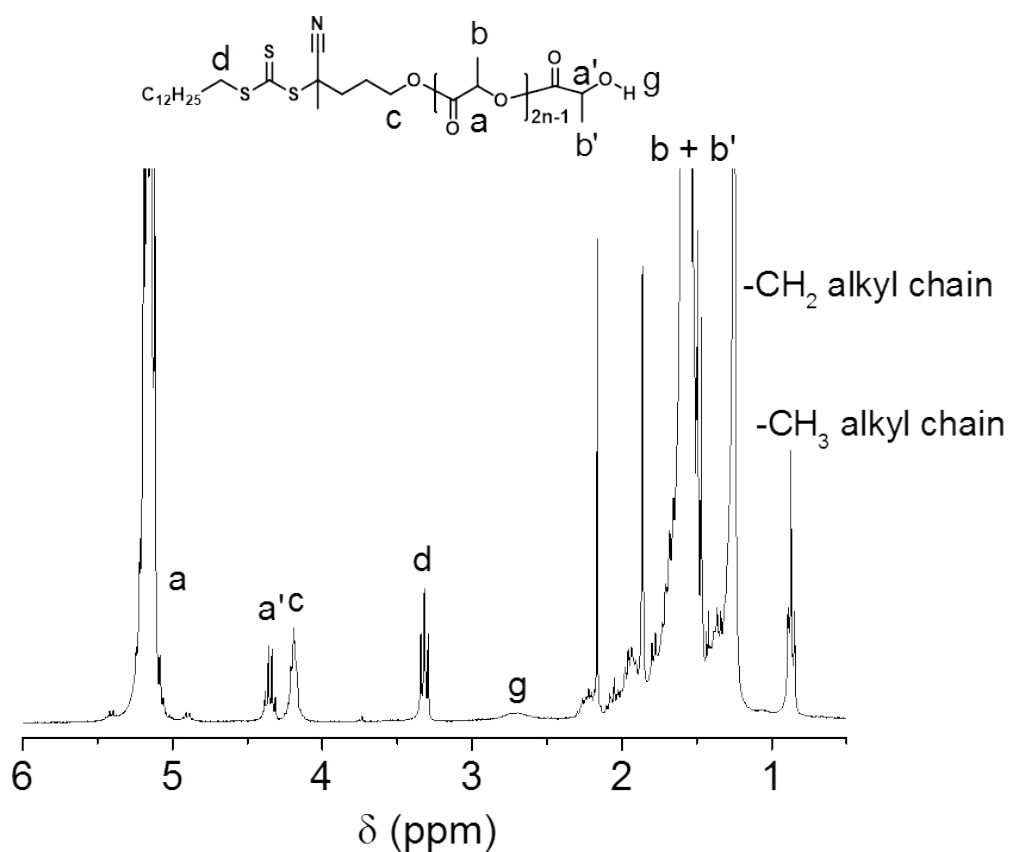

**Figure S2.**  $^1\text{H}$  NMR spectrum ( $\text{CDCl}_3$ , 300 MHz) of the isolated **PLA-CTA** together with the assignment of the observed peaks.

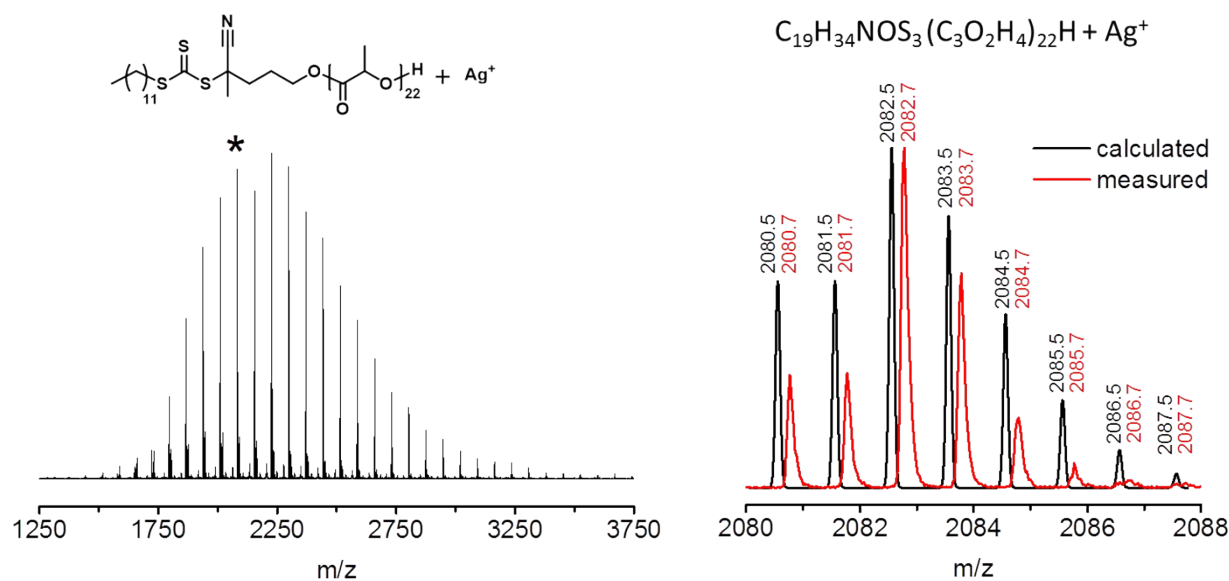

**Figure S3.** Left: MALDI-ToF mass spectrum of the PLA-CTA. Right: Overlay of the calculated and measured isotopic pattern for the structural assignment of the observed peaks.

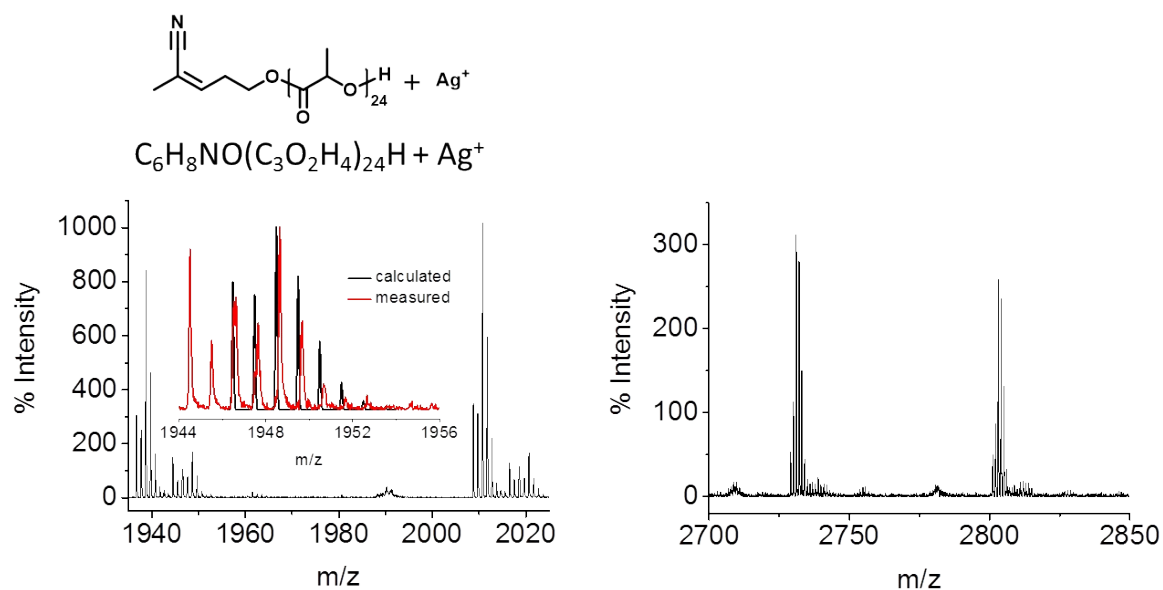

**Figure S4.** Left: Zoom into the lower  $m/z$  region of the MALDI-ToF mass spectrum of the PLA-CTA together with an overlay of the minor distribution assigned to fragmentation of the CTA. Right: Zoom into the higher  $m/z$  region of the MALDI-ToF mass spectrum of the PLA-CTA.

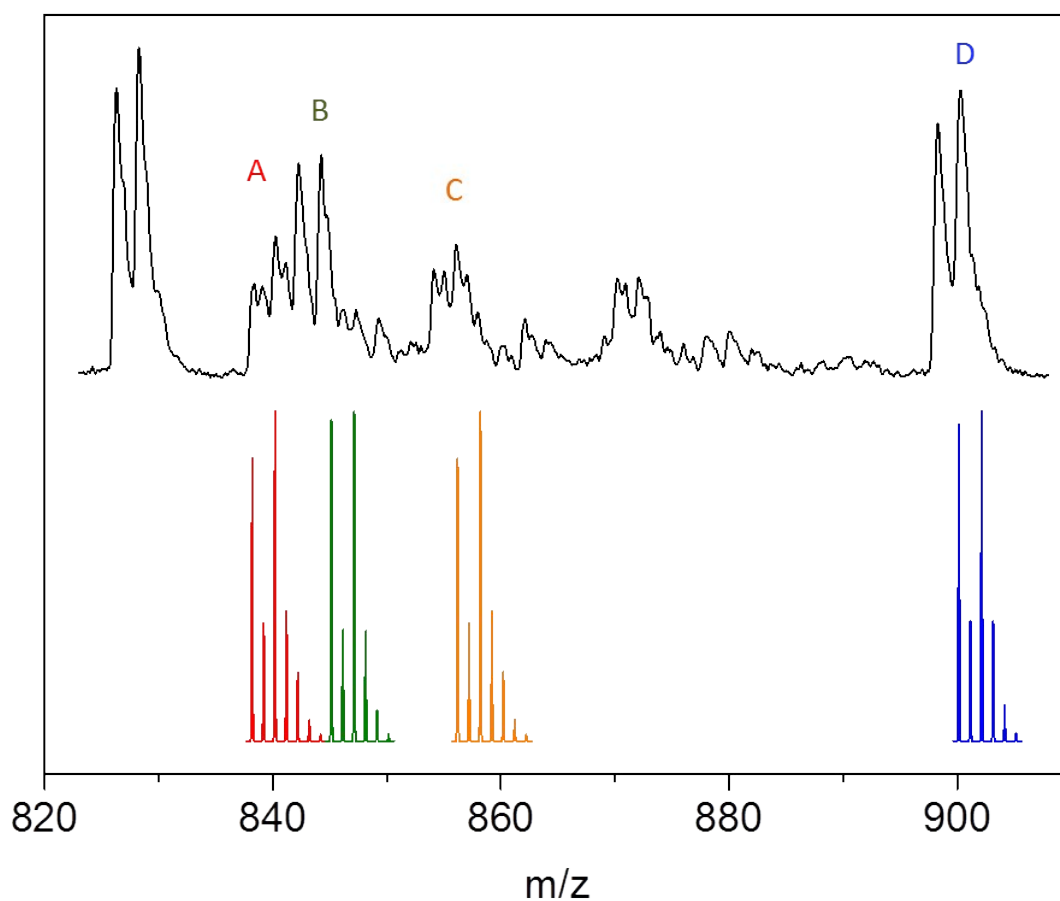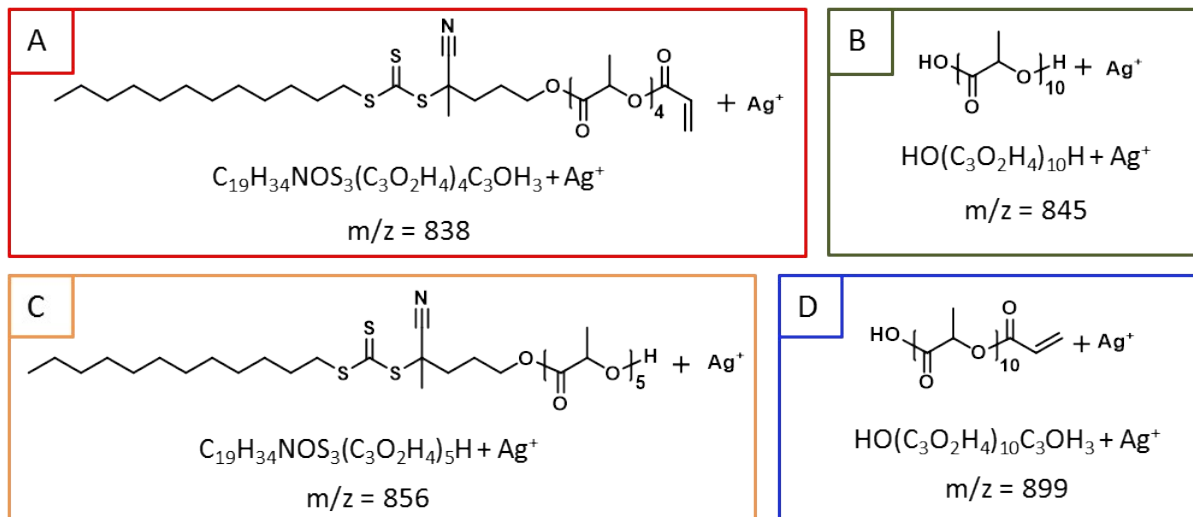

**Figure S5.** Zoom into the MALDI-ToF MS/MS spectrum of **PLA-CTA** (region from  $m/z$  820 to  $m/z$  910) together with the structural assignment of the observed peaks.

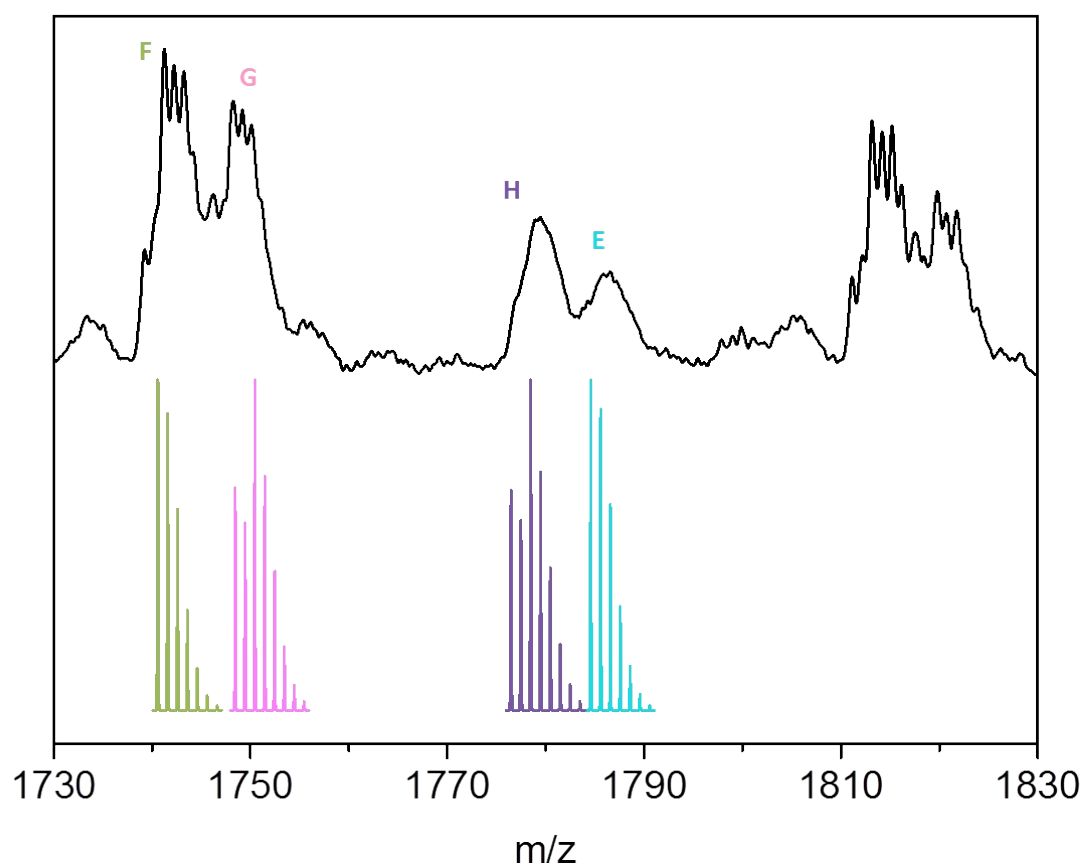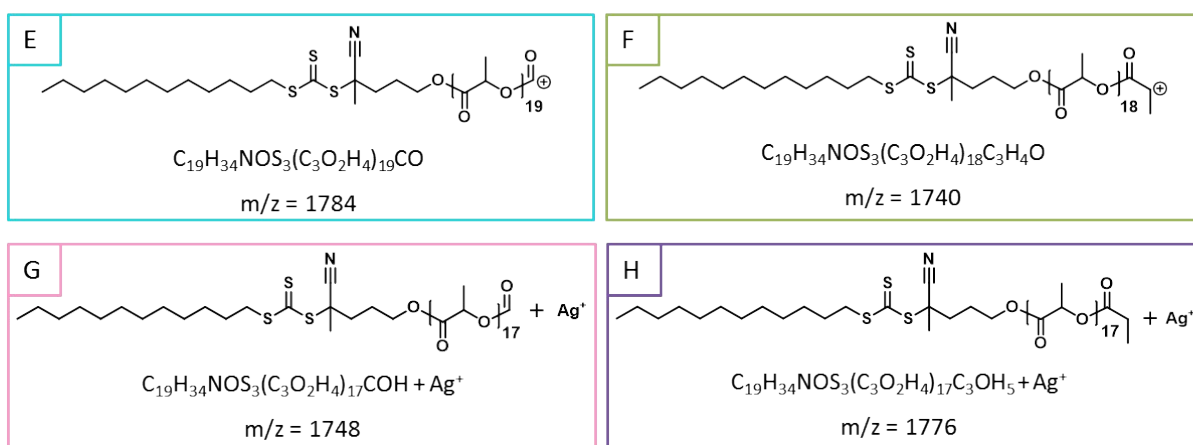

**Figure S6.** Zoom into the MALDI-ToF MS/MS spectrum of **PLA-CTA** (region from  $m/z$  1910 to  $m/z$  2040) together with the structural assignment of the observed peaks.

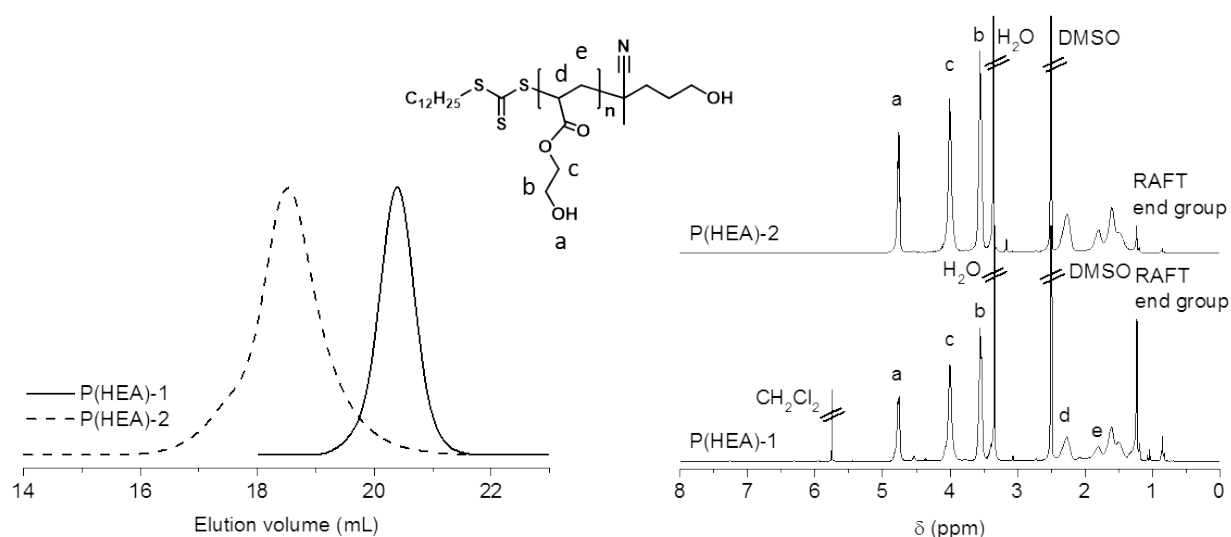

**Figure S7.** Analysis of the isolated **PHEA-1** and **PHEA-2**. **Left:** Overlay of the normalized SEC traces (DMAC, RI detection). **Right:** Overlay of the  $^1\text{H}$  NMR spectra (DMSO- $\text{d}_6$ , 300 MHz).

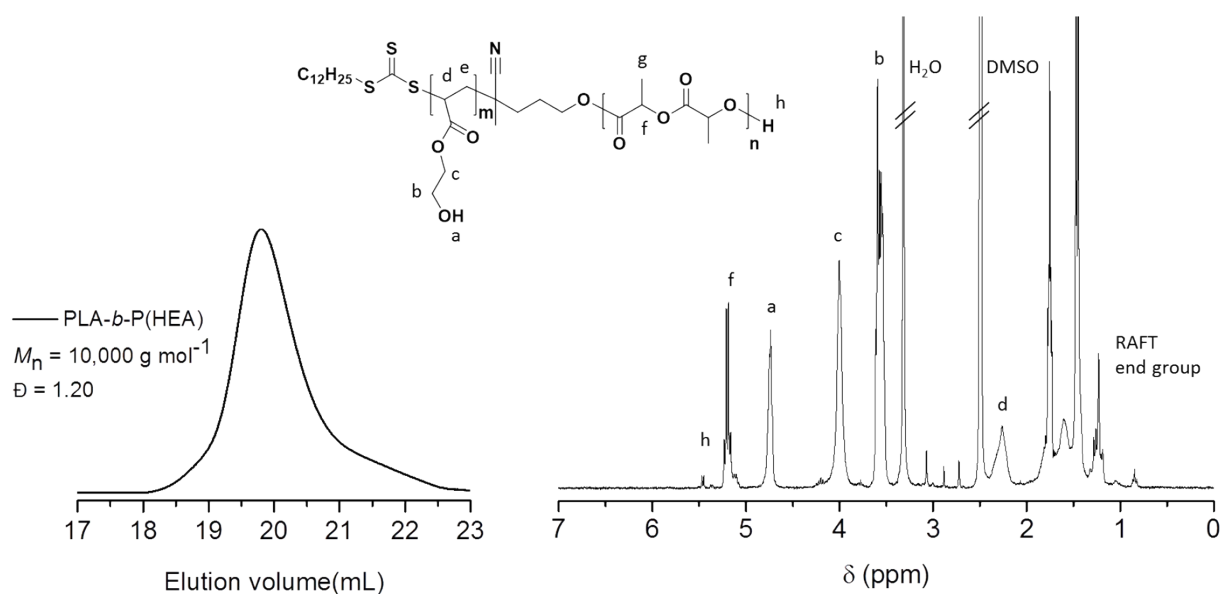

**Figure S8.** Analysis of the **PLA-*b*-PHEA** prepared in two steps *via* chain extension of the purified **PLA-CTA**. **Left:** SEC trace (DMAC, RI detection, PMMA calibration). **Right:**  $^1\text{H}$  NMR spectrum (DMSO- $\text{d}_6$ , 300 MHz).

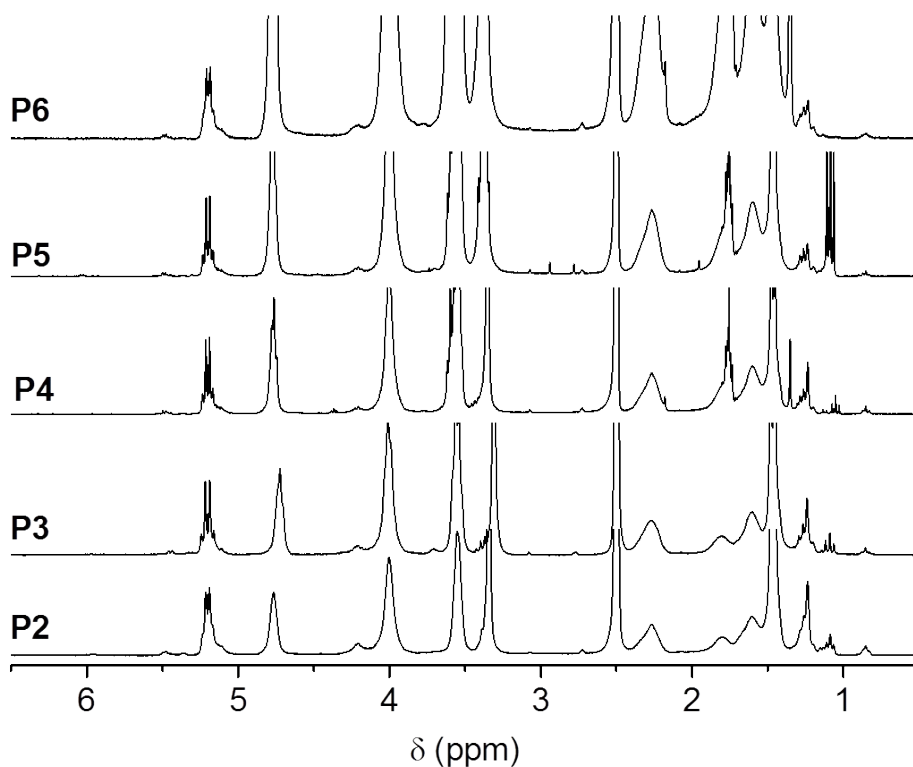

**Figure S9.** Overlay of the  $^1\text{H}$  NMR spectra (DMSO- $d_6$ , 300 MHz) of block copolymers **P2** to **P6** synthesized at one-pot. For clarity, the spectra were normalized according to the signal of the methine protons of PLA at  $\delta = 5.16$  ppm.

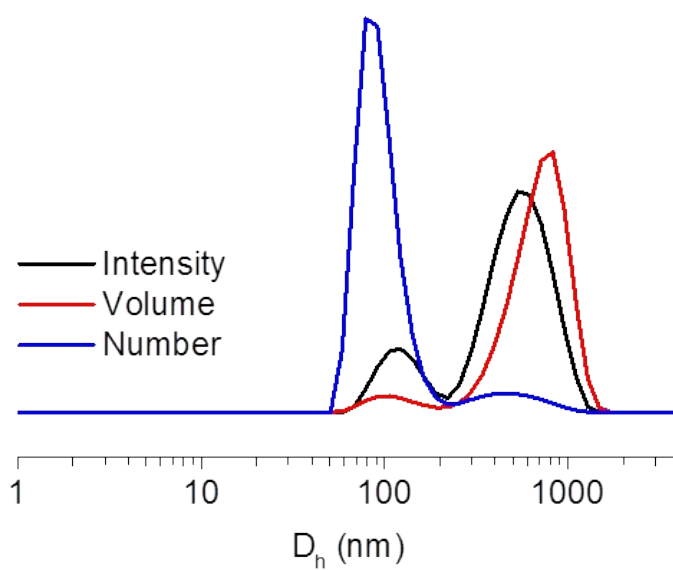

**Figure S10.** DLS size distribution of **P6** dissolved in DMSO.

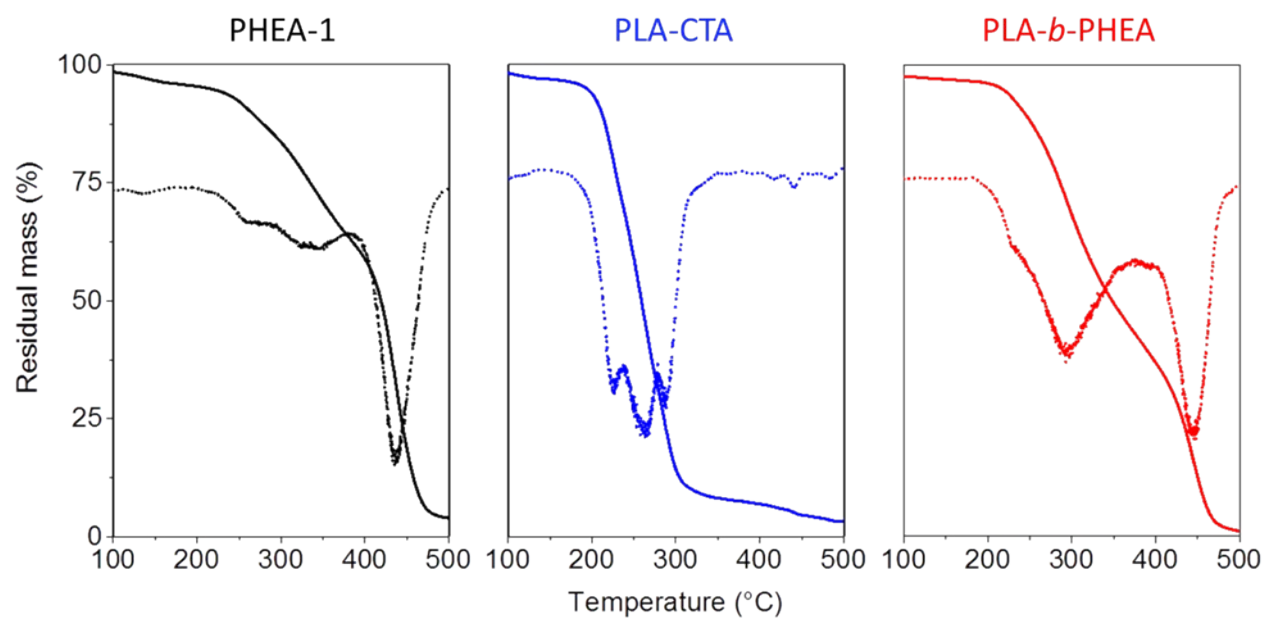

**Figure S11.** TGA thermograms of **PHEA-1**, the PLA macro-CTA, and **P1** (20 to 600 °C, 10.0 °C min<sup>-1</sup>). The dotted lines represent the first derivative of the measured traces.



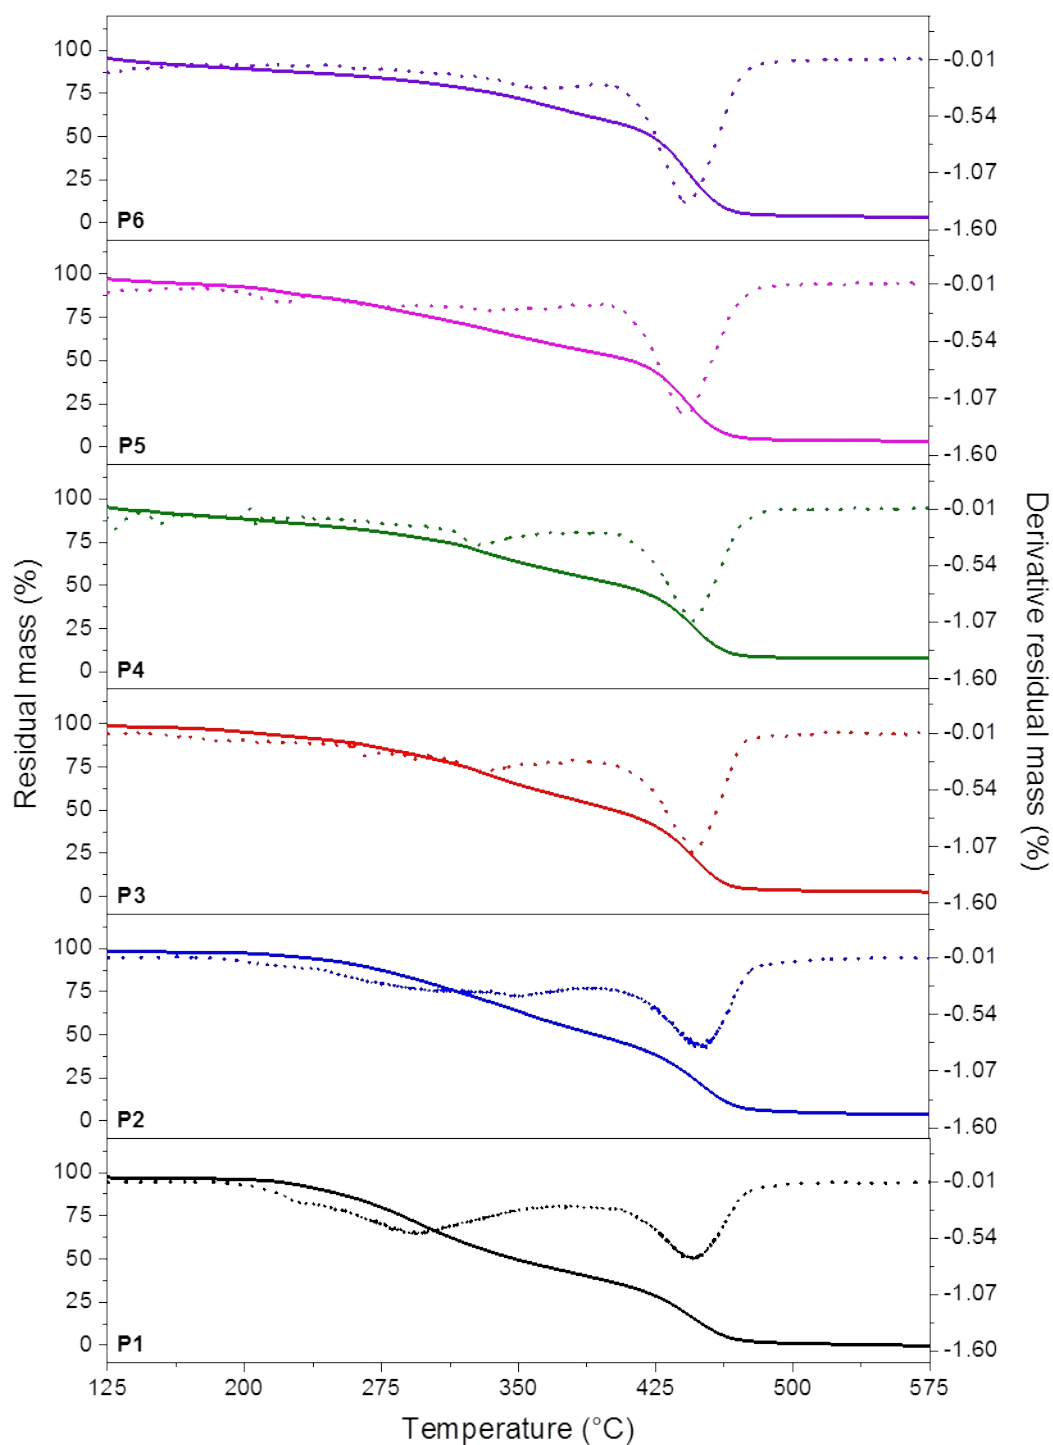

**Fi**

**Figure S12.** Overlay of the TGA thermograms of the block copolymers **P1** to **P6** synthesized in a one-pot approach (heating rate 10 K min<sup>-1</sup>). The dotted lines depict the first derivative of each thermogram.

**Table 1.** Summary of the thermal characterization data obtained *via* DSC analysis.

|                                                                 | PLA-CTA | PHEA-1 | PHEA-2 | P1          | P2   | P3   | P4   | P5   | P6   |
|-----------------------------------------------------------------|---------|--------|--------|-------------|------|------|------|------|------|
| $w_{\text{HEA}}^*$                                              | 0       | 100    | 100    | 0.46        | 0.56 | 0.60 | 0.68 | 0.73 | 0.82 |
| $T_{g, \text{Exp. in } ^\circ\text{C}^a}$<br>(inflection point) | 38      | −1     | 5      | 11 / 30     | 6    | 3    | 12   | 13   | 12   |
| $T_{g, \text{onset}}$                                           | 32      | −6     | −3     | 4 / 28      | −1   | −9   | 5    | 7    | 4    |
| $T_{g, \text{mid}}$                                             | 37      | −1     | 4      | 10 / 33     | 5    | 2    | 11   | 12   | 10   |
| $T_{g, \text{end}}$                                             | 42      | 4      | 11     | 17 / 39     | 10   | 13   | 17   | 17   | 17   |
| $\Delta C_p$ in $\text{J mol}^{-1} \text{K}^{-1}$               | 0.52    | 0.47   | 0.46   | 0.15 / 0.17 | 0.53 | 0.56 | 0.43 | 0.41 | 0.45 |
| $T_{g, \text{Fox in } ^\circ\text{C}^b}$                        |         |        |        | 20          | 17   | 15   | 13   | 11   | 8    |
| $T_{g, \text{Wood in } ^\circ\text{C}^c}$                       |         |        |        | 22          | 19   | 17   | 14   | 13   | 9    |

<sup>a</sup> Determined by DSC analysis ( $T_g$  values are reported as inflection point of the third heating trace). <sup>b</sup> Calculated according to  $1/T_g = M_1/T_{g1} + M_2/T_{g2}$ , where  $M_1$  and  $M_2$  are the weight fractions of **HEA** and **LA**, respectively.<sup>1, 2</sup> <sup>c</sup> Calculated according to  $T_g = (M_1\Delta C_{p1}T_{g1} + M_2\Delta C_{p2}T_{g2})/(M_1\Delta C_{p1} + M_2\Delta C_{p2})$ .<sup>2, 3</sup> Averaged  $T_g$  and  $\Delta C_p$  values of **PHEA** were used for the calculation of the  $T_g$  *via* Fox and Wood equations. \*  $M_1$  and  $M_2$  values as estimated from feed and conversion.

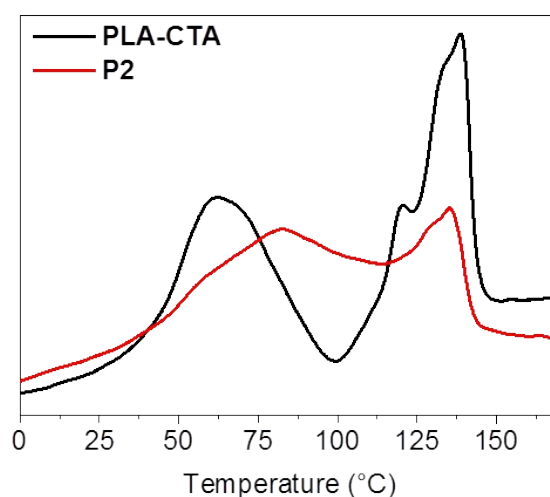

**Figure S13.** Overlay of the DSC thermograms of **PLA-CTA** and **P2** depicting the presence of crystallization and melting peaks (1<sup>st</sup> heating run, heating rate 20 K min<sup>−1</sup>).

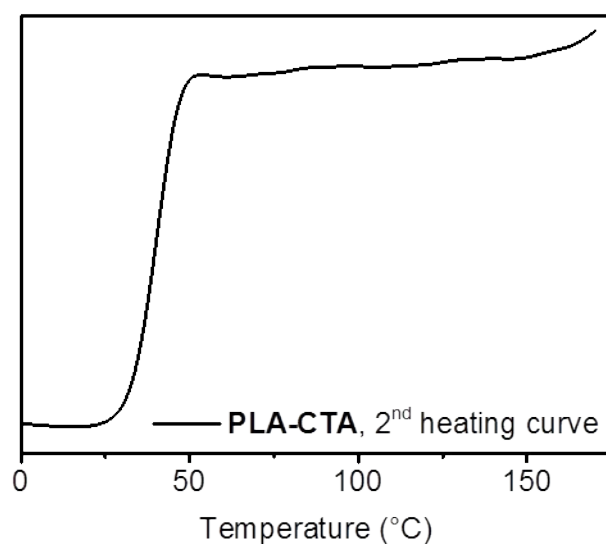

**Figure S14.** DSC thermogram of the **PLA-CTA** (heating rate 20 K min<sup>-1</sup>) showing the absence of a melting peak in the second heating run.

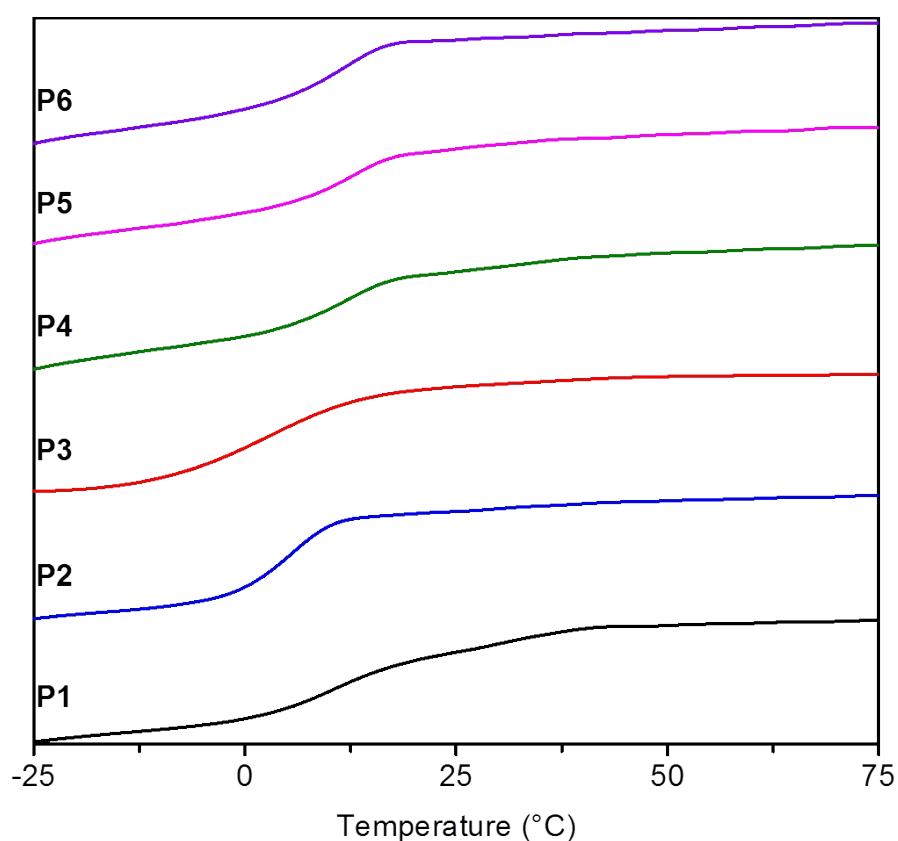

**Figure S15.** Overlay of the DSC thermograms of block copolymers **P1** to **P6** synthesized in a one pot approach (3<sup>rd</sup> heating run, heating rate 10 K min<sup>-1</sup>). The individual thermograms are shifted vertically for clarity.

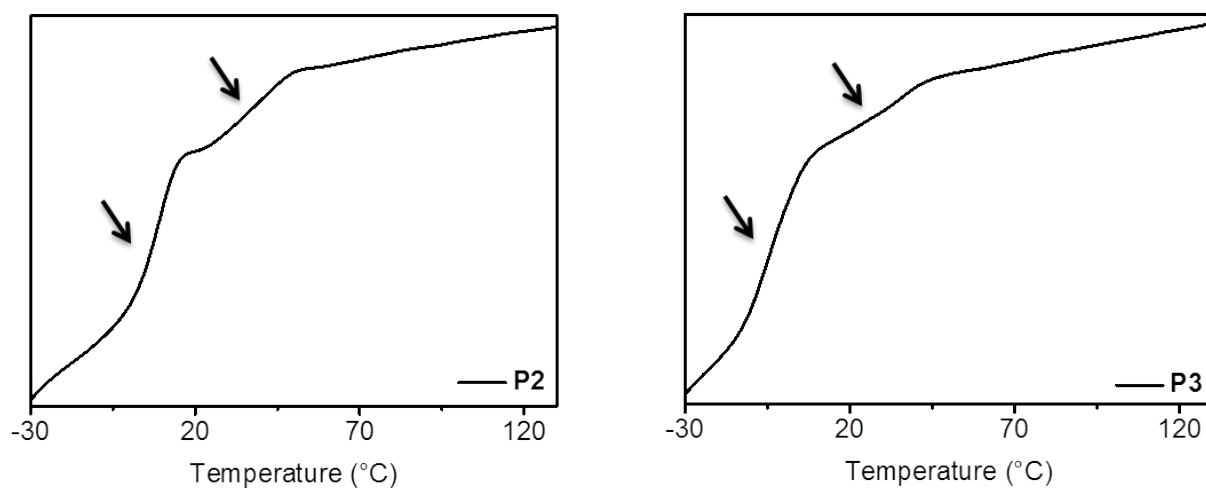

**Figure S16.** DSC thermograms of **P2** and **P3** obtained with a modified temperature program showing the presence of two glass transitions. The samples were heated to 170 °C and cooled to -50 °C at a rate of 5 K min<sup>-1</sup>. The thermograms depict a subsequent heating run (rate 10 K min<sup>-1</sup>). Increased heating rates did not improve the resolution of the two glass transitions.

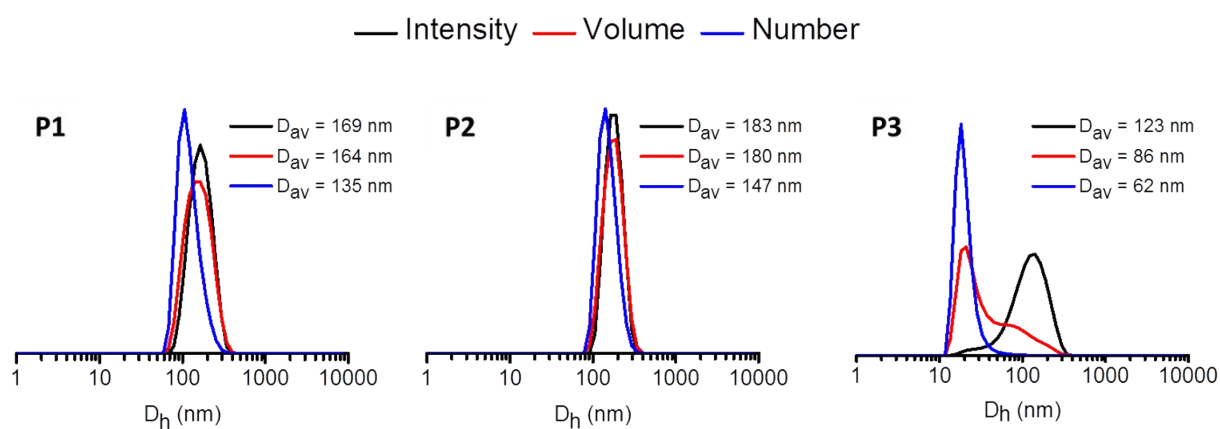

**Figure S17.** DLS size distributions of **P1**, **P2** and **P3** ( $c = 2 \text{ mg mL}^{-1}$  in water).

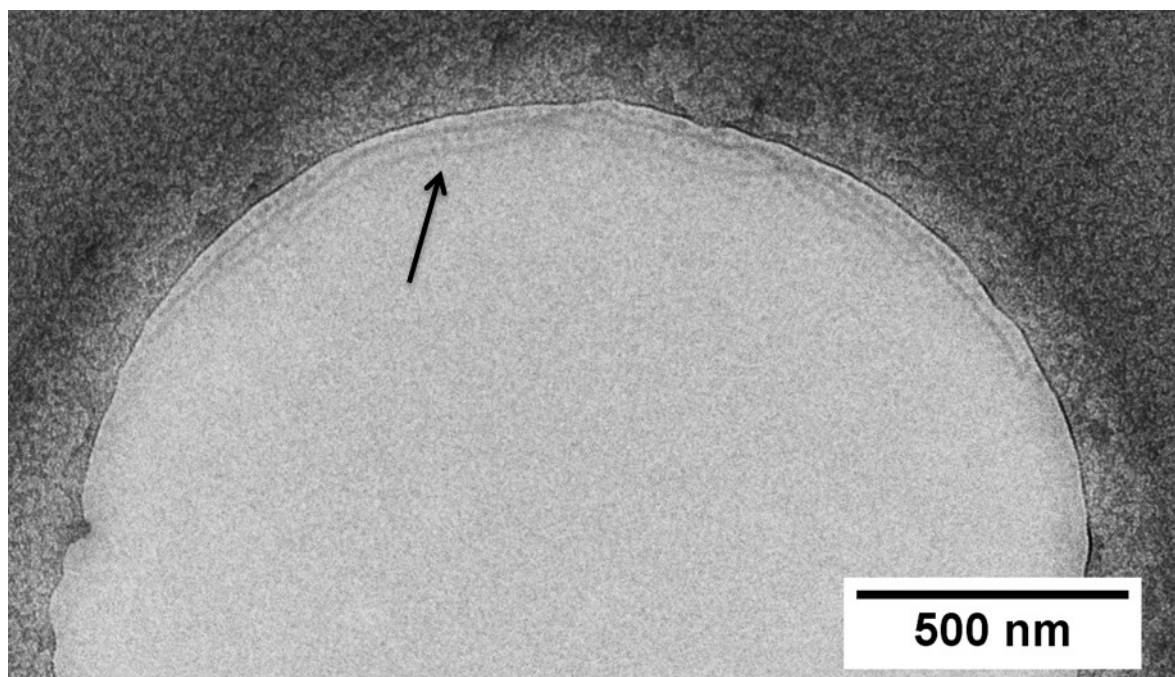

**Figure S18.** Additional cryo-TEM image of **P4** showing worm-like micelles occasionally found in the amorphous ice layers ( $c = 2 \text{ mg mL}^{-1}$  in water).

1. T. G. Fox, *Bull. Am. Phys. Soc.*, 1956, **1**, 123.
2. P. R. Couchman, *Macromolecules*, 1978, **11**, 1156-1161.
3. L. A. Wood, *J. Polym. Sci.*, 1958, **28**, 319-330.
